# Supplementary material
Source: publisher figshare collection journal article supplement (https://tandf.figshare.com/ndownloader/files/17544542)
Supplement: Supplementary file 1 [file 17544542]

**Supporting information**

**A new electrochemical sensing platform for quantitative determination of diclofenac based on gold nanoparticles decorated multiwalled carbon nanotubes/graphene oxide nanocomposite film**

Farzaneh Nasiri, Gholam Hossein Rounaghi*[[1]](#footnote-1), Narges Ashraf, Behjat Deiminiat

*Department of Chemistry, Faculty of sciences, Ferdowsi University of Mashhad, Mashhad-Iran*

**Figures Caption**

Figure S1. Differential pulse voltammograms of diclofenac at the surface of one f-MWCNTs-GO/AuNPs modified gold electrode.

Figure S2. Differential pulse voltammograms of diclofenac at the surface of five f-MWCNTs-GO/AuNPs modified gold electrodes.

Figure S3. Differential pulse voltammograms of diclofenac in the absence and presence of some of the interfering species in solution.

Figure S1

Figure S2

Figure S3

1. ∗Corresponding author: Tel: +98 5138805542

   E-mail address: ghrounaghi@yahoo.com; ronaghi@um.ac.ir [↑](#footnote-ref-1)
